# Supplementary material for: Femtosecond laser patterned silicon embedded with gold nanostars as a hybrid SERS substrate for pesticide detection
Source: Royal Society of Chemistry journal article supplement (doi:10.1039/d2ra07859g), 2023-01-01
Supplement: d2ra07859g1.pdf [file d2ra07859g1.pdf]

**Supporting Information for**

**Femtosecond Laser Patterned Silicon Embedded with Gold  
Nanostars as SERS Substrate for Pesticide Detection**

**Sree Satya Bharati Moram<sup>1</sup>, Chandu Byram<sup>2</sup>, and Venugopal Rao Soma<sup>1,\*</sup>**

*<sup>1</sup>Advanced Centre for Research in High Energy Materials (ACRHEM),  
DRDO Industry Academia - Centre of Excellence (DIA-COE)  
University of Hyderabad, Prof. C. R. Rao Road, Hyderabad 500046, Telangana, India*

*<sup>2</sup>Department of Physics, College of Arts and Sciences, University of Dayton,  
300 College Park, Dayton, Ohio 45469, USA*

*\*Corresponding author e-mail: [soma\\_venu@uohyd.ac.in](mailto:soma_venu@uohyd.ac.in) OR [soma\\_venu@yahoo.com](mailto:soma_venu@yahoo.com)*

**Table T1:** Raman peaks and their assignments of NB<sup>11</sup>

| Peak position (cm <sup>-1</sup> ) | Assignment (NB)                  |
|-----------------------------------|----------------------------------|
| 496                               | C-C-C deformation                |
| 590                               | C-C-C and C-N-C deformations     |
| 663                               | In-plane CCC or NCC deformations |
| 1185                              | C-H bending                      |
| 1350, 1484 and 1629               | Ring stretching                  |

**Figure S1:** Raman spectra of thiram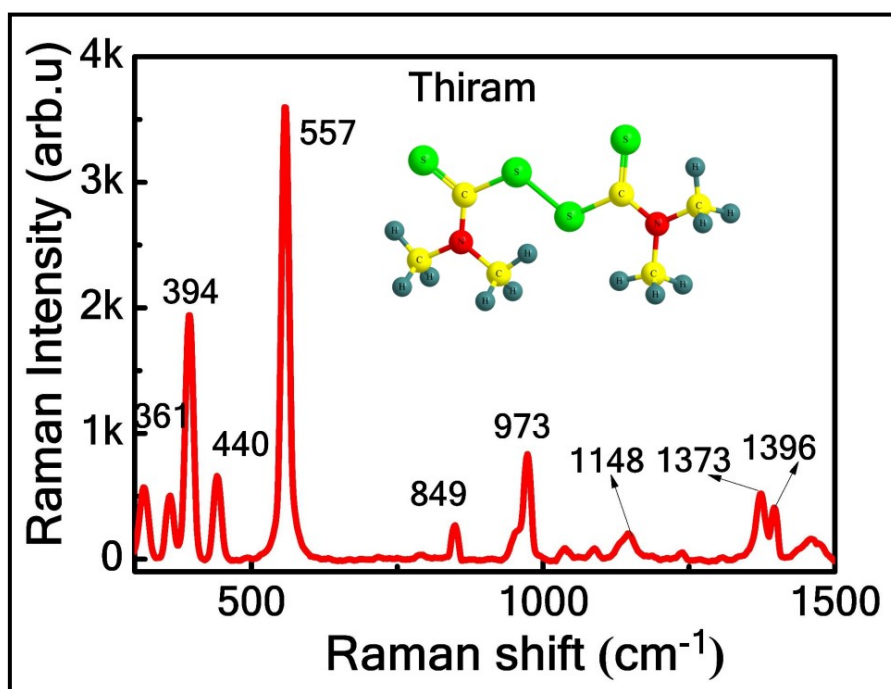**Table T2:** Thiram Raman vibrational modes and their corresponding assignments

| Raman Peak (cm <sup>-1</sup> ) | (Thiram) Assignment                                     |
|--------------------------------|---------------------------------------------------------|
| 361                            | SCS deformation                                         |
| 440                            | CH <sub>3</sub> NC deformation and C-S stretching       |
| 557                            | S-S symmetric stretching                                |
| 849                            | CH <sub>3</sub> N stretching                            |
| 973                            | C-S and CH <sub>3</sub> N stretching                    |
| 1148                           | C-N stretching mode                                     |
| 1373                           | CN stretching and symmetric deformation CH <sub>3</sub> |
| 1396                           | -                                                       |

Figure S2: Raman spectra of TBZ

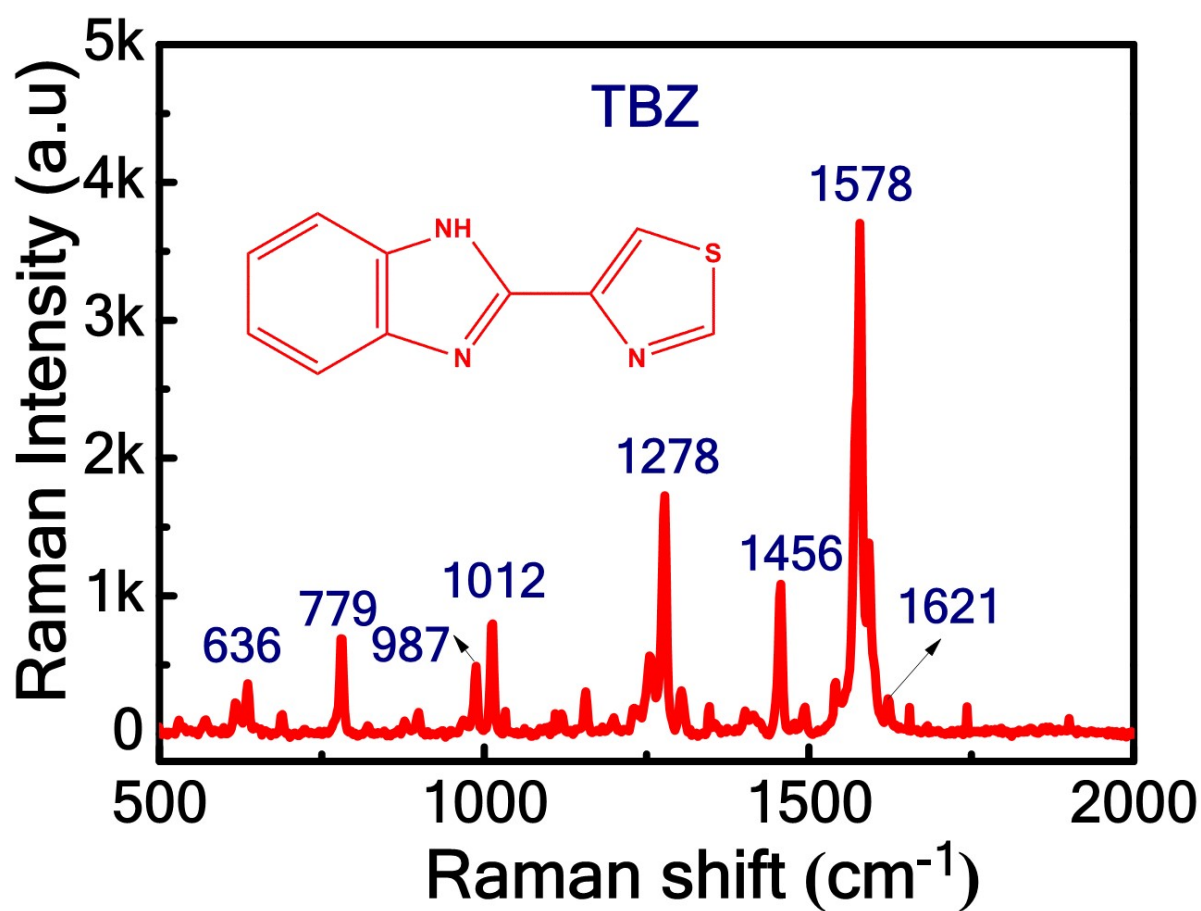

**Table T3:** TBZ Raman vibrational modes and their corresponding assignments:

| Peak position (cm <sup>-1</sup> ) | Assignment (TBZ)                                               |
|-----------------------------------|----------------------------------------------------------------|
| 638                               | In plane C-C-C bending, In plane S-C-N bending                 |
| 778                               | Out-of-plane C-H bending, C-S stretching, in-plane C=N bending |
| 983                               | C-S stretching                                                 |
| 1007                              | Out of plane C-H bending, C-N stretching, C-C stretching       |
| 1278                              | Ring stretching vibrations                                     |
| 1456                              | C=N stretching                                                 |
| 1578                              | C=N stretching, Ring stretching                                |
| 1622                              | C=N stretching                                                 |

**Figure S3:**  
Raman spectra of TBZ 25 mM using bare Si and Si<sub>0.5</sub>C (without Au NSs)

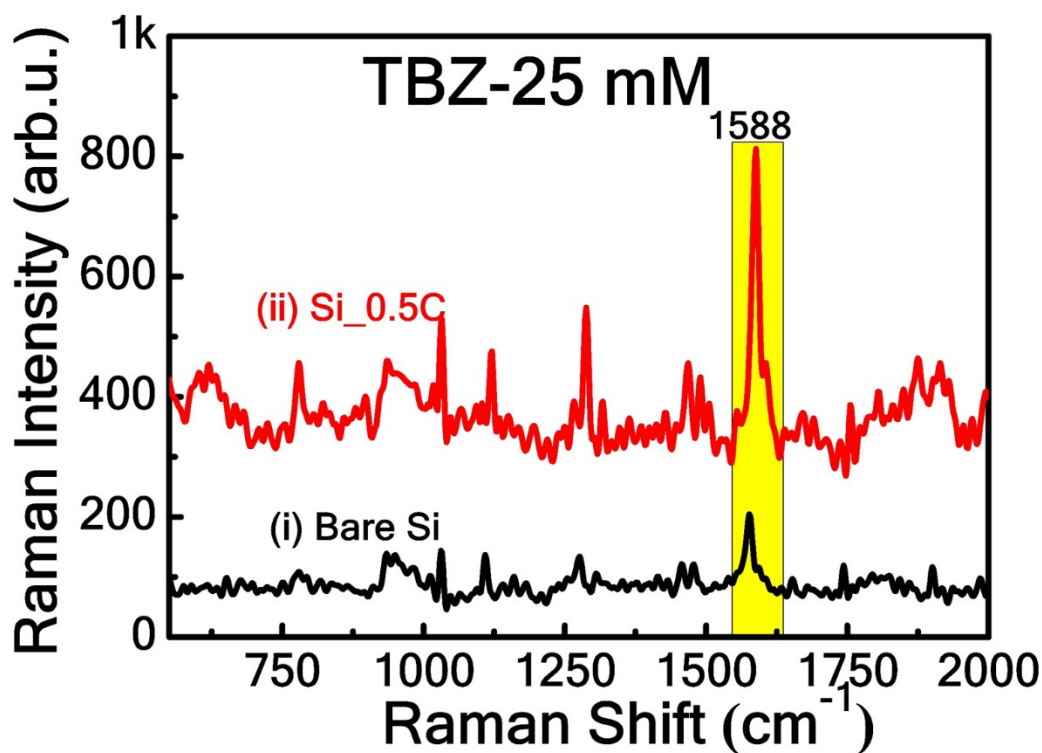

**Figure S4:** (a) concentration dependent SERS spectra of TBZ (b) SERS intensity as a function of concentration for 1578 cm<sup>-1</sup> using Si<sub>0.5</sub>C with Au nanostars.

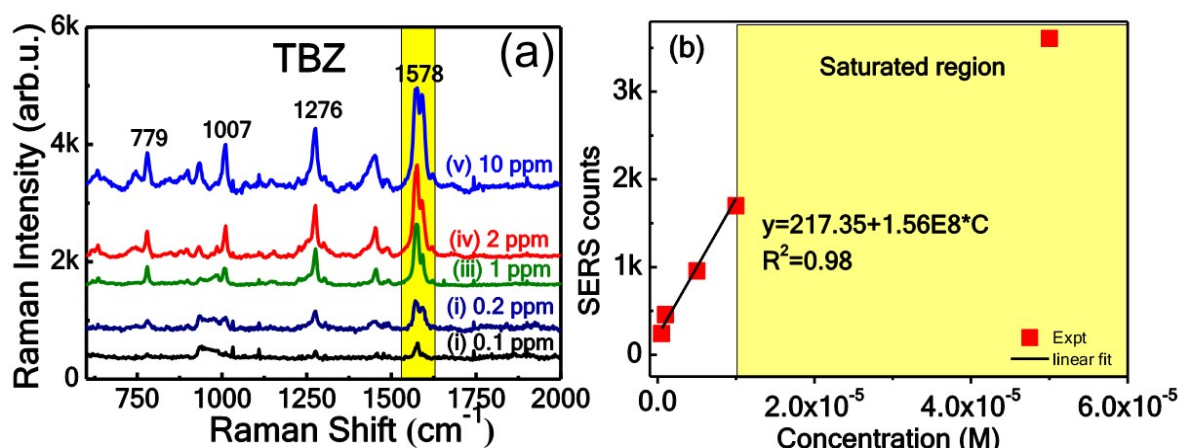

LOD value was calculated using the formula  $LOD = 3 \sigma/b$ , where ‘ $\sigma$ ’ is the standard deviation of the blank, and ‘ $b$ ’ is the gradient of the linear equation. The slope “ $b$ ” is obtained from the Intensity Vs Concentration plots. To calculate the LOD for TBZ, the concentration dependent SERS spectra of TBZ shown in figure below (a). The most prominent peak  $1578 \text{ cm}^{-1}$  was chosen to calculate LOD. Figures (b) represent the I Vs C plot, consists of saturation region and shown in yellow colour. The linear curve fit ( $R^2=0.98$ ) slope “ $b$ ” used to calculate LOD and was  $\sim 11 \text{ ppb}$

**Figure S5:**  
SERS spectra of MB+NB mixture solution from 10 different locations using Si<sub>0.5</sub>C with Au nanostars

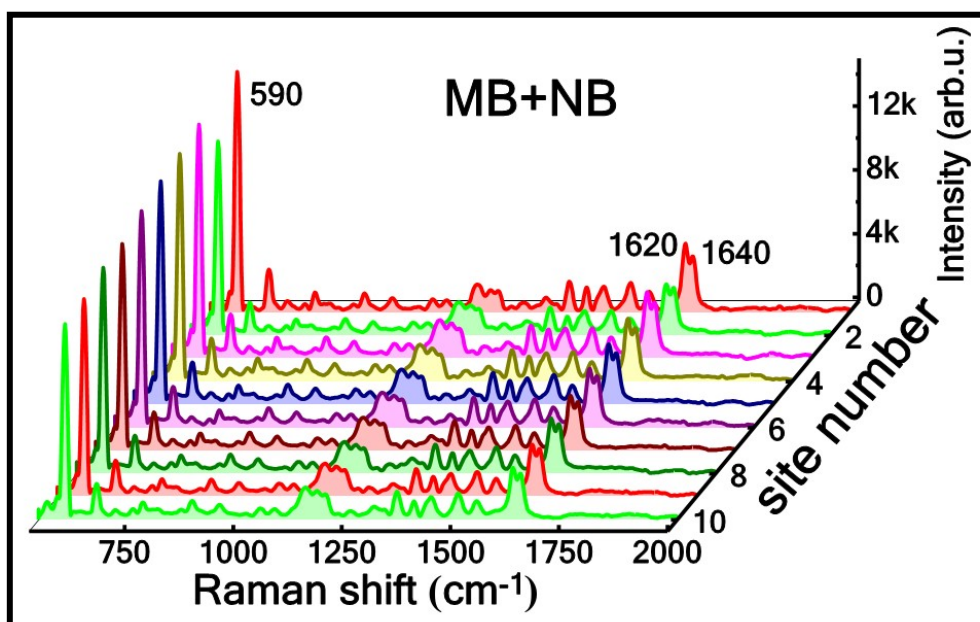

**Figure S6:** SERS spectra of thiram+TBZ mixture solution from more than 10 different locations using Si<sub>0.5</sub>C with Au nanostars

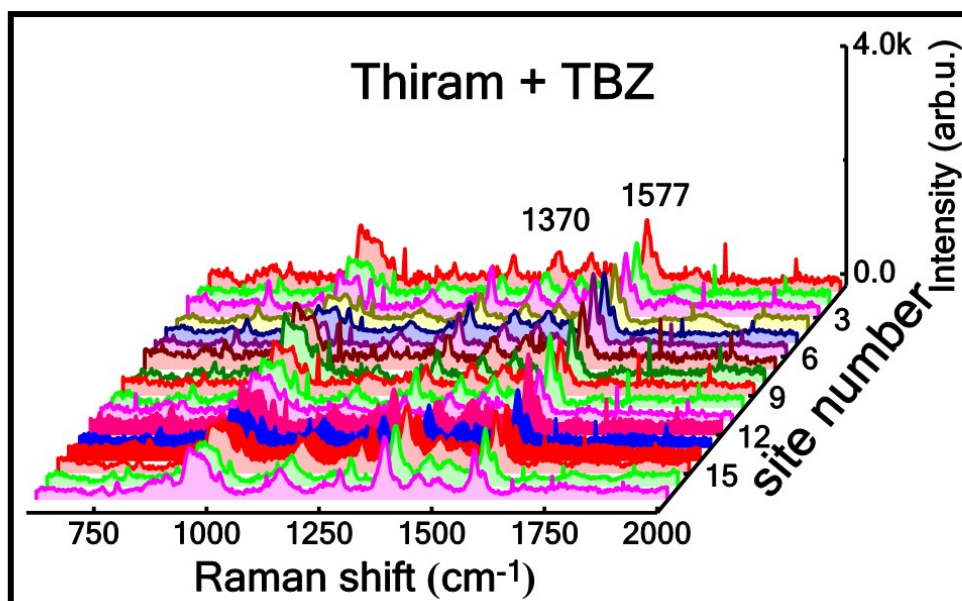

#### References:

- [1] G. Bodelón, V. Montes-García, C. Fernández-López, I. Pastoriza-Santos, J. Pérez-Juste and L. M. Liz-Marzán, 2015, *Small*, **11**, 4149-4157.
- [2] J. Zhu, M.-J. Liu, J.-J. Li, X. Li and J.-W. Zhao, 2018, *Spectrochim. Acta A Mol. Biomol. Spectrosc.*, **189**, 586-593.
- [3] F. K. Alsammarraie, M. Lin, A. Mustapha, H. Lin, X. Chen, Y. Chen, H. Wang and M. Huang, 2018, *Food Chem.*, **259**, 219-225.
